# Supplementary material for: Active P species in P-doped graphite carriers improving the electrocatalytic performance of supported Pt towards the hydrogen evolution reaction
Source: Royal Society of Chemistry journal article supplement (doi:10.1039/d1nj04030h), 2021-01-01
Supplement: d1nj04030h1.pdf [file d1nj04030h1.pdf]

## Supporting Information

### **Active P species in P-doped graphite carrier improving the catalytic performance of supported Pt towards the hydrogen evolution reaction**

Zekun Li<sup>a</sup>, Fei Han<sup>b</sup>, Ziwu Liu<sup>a,\*</sup>, Qiancheng Peng<sup>a</sup>, Quan-De Wang<sup>a</sup>, Maomao Sun<sup>a</sup>, Guo-Jun Kang<sup>a,\*</sup>

<sup>a</sup>Jiangsu Key Laboratory of Coal-based Greenhouse Gas Control and Utilization, School of Chemical Engineering and Jiangsu Province Engineering Laboratory of High Efficient Energy Storage Technology and Equipments, China University of Mining & Technology, Xuzhou 221008, Jiangsu, China

<sup>b</sup>School of Mineral Processing and Bioengineering, Central South University, Changsha 410083, Hunan, China

\*Corresponding author, Email address: lzwmsy@cumt.edu.cn, Fax: 86-516 83883501.

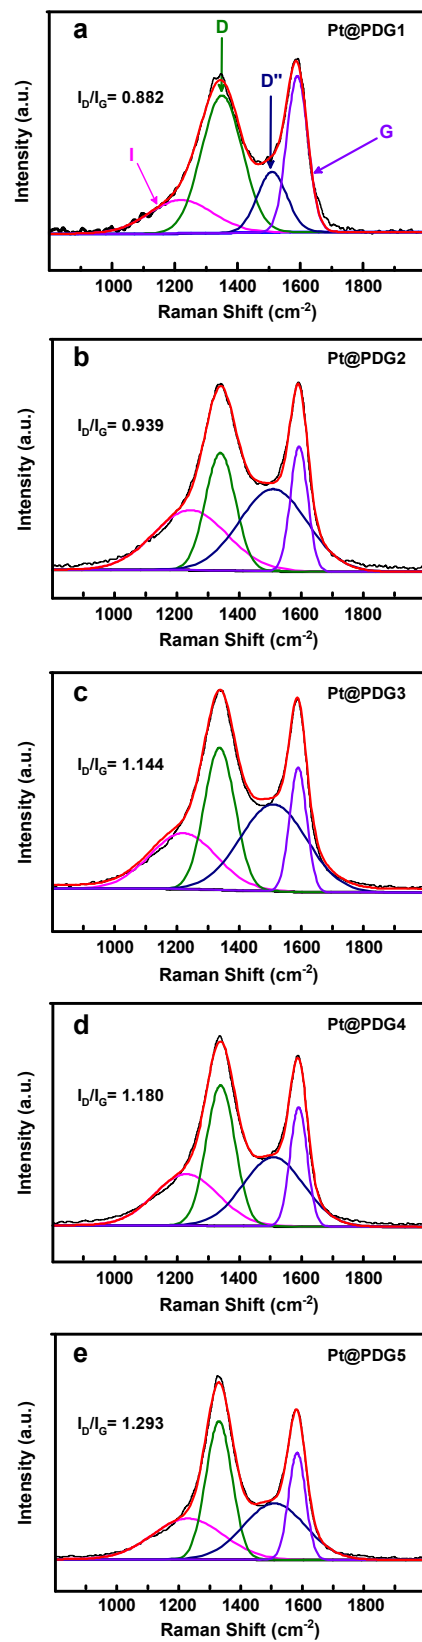

**Figure S1.** The detailed Raman spectrum of Pt@PDG1 (a), Pt@PDG2 (b), Pt@PDG3 (c),

Pt@PDG4 (d) and Pt@PDG5 (e).

The D band located at  $\sim 1350\text{ cm}^{-2}$  and the G band located at  $\sim 1580\text{ cm}^{-2}$  reflect the degree of lattice defects and the  $E_{2g}$  vibration of carbon atoms, respectively. The other two peaks at  $\sim 1220\text{ cm}^{-2}$  and  $\sim 1500\text{ cm}^{-2}$  can be classified as I band and D" band, respectively. The I band corresponds to the disorder in the graphitic lattice,  $sp^2$ - $sp^3$  bonds, or the presence of polyenes, and the D" band is generally considered to be related to the presence of amorphous carbon.

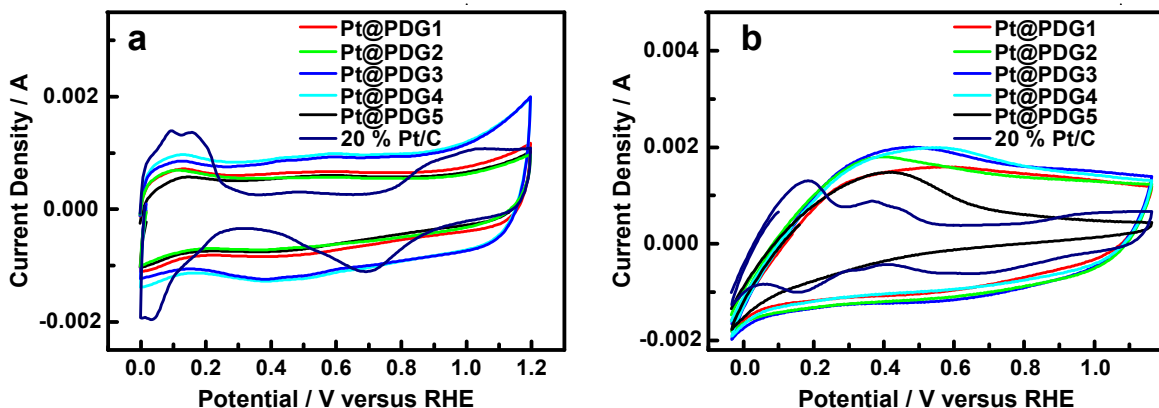

**Figure S2.** The CVs of Pt@PDG1, Pt@PDG2, Pt@PDG3, Pt@PDG4 and Pt@PDG5 and 20% Pt/C in  $N_2$ -saturated 0.5 M  $H_2SO_4$  (a) and 0.1 M KOH (b) solutions.

Electrochemically active surface area (ECSA) values can be calculated from the coulombic charge for the hydrogen adsorption and desorption ( $Q_H$ ) in the negative-going potential scan according to the following formula <sup>1</sup>:  $ECSA = Q_H / [Pt] (0.21)$ , where  $[Pt]$  represents the platinum loading ( $g\text{ cm}^{-2}$ ) in the electrode,  $Q_H$  is the charge for hydrogen desorption ( $mC\text{ cm}^{-2}$ ), and 0.21 represents the charge required to oxidize a monolayer of  $H_2$  on bright Pt ( $mC\text{ cm}^{-2}$ ).

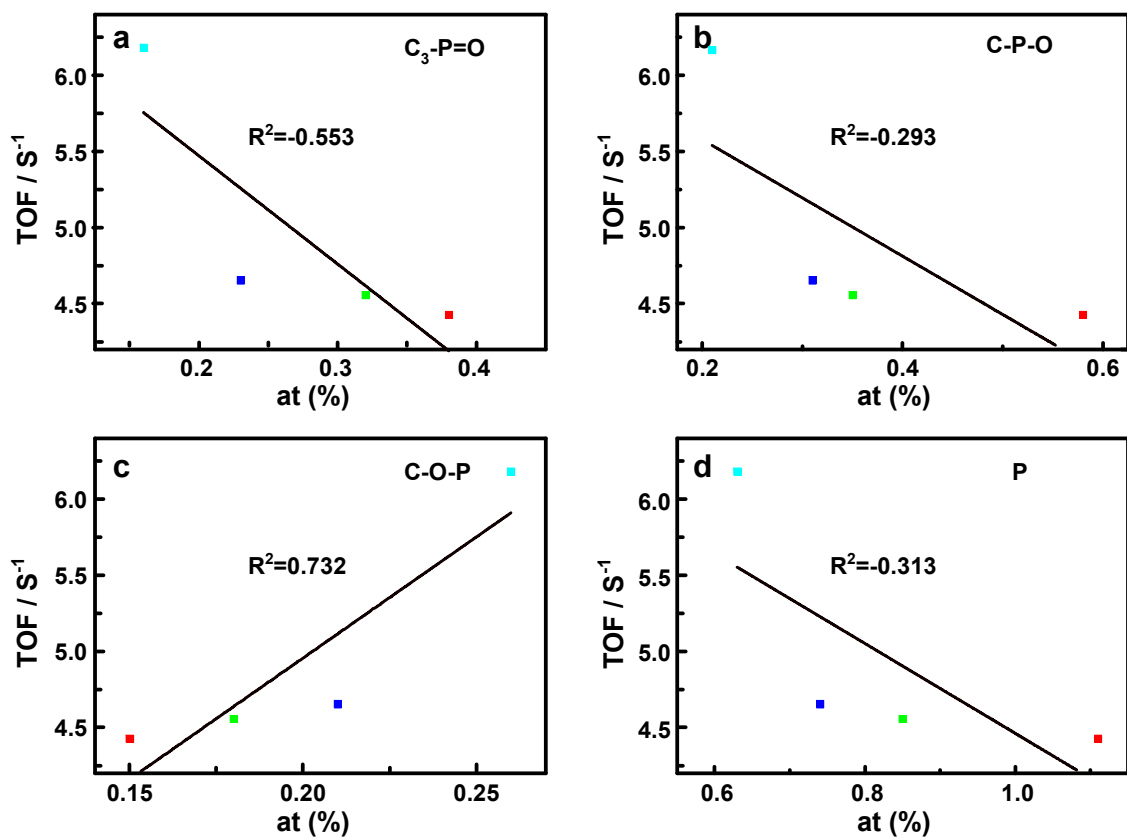

**Figure S3.** The relevancy between the TOF of Pt@PDG1 (■), Pt@PDG2 (■), Pt@PDG3 (■) and Pt@PDG4 (■) at -0.2 V overpotential and the P species contents in them under acidic media.

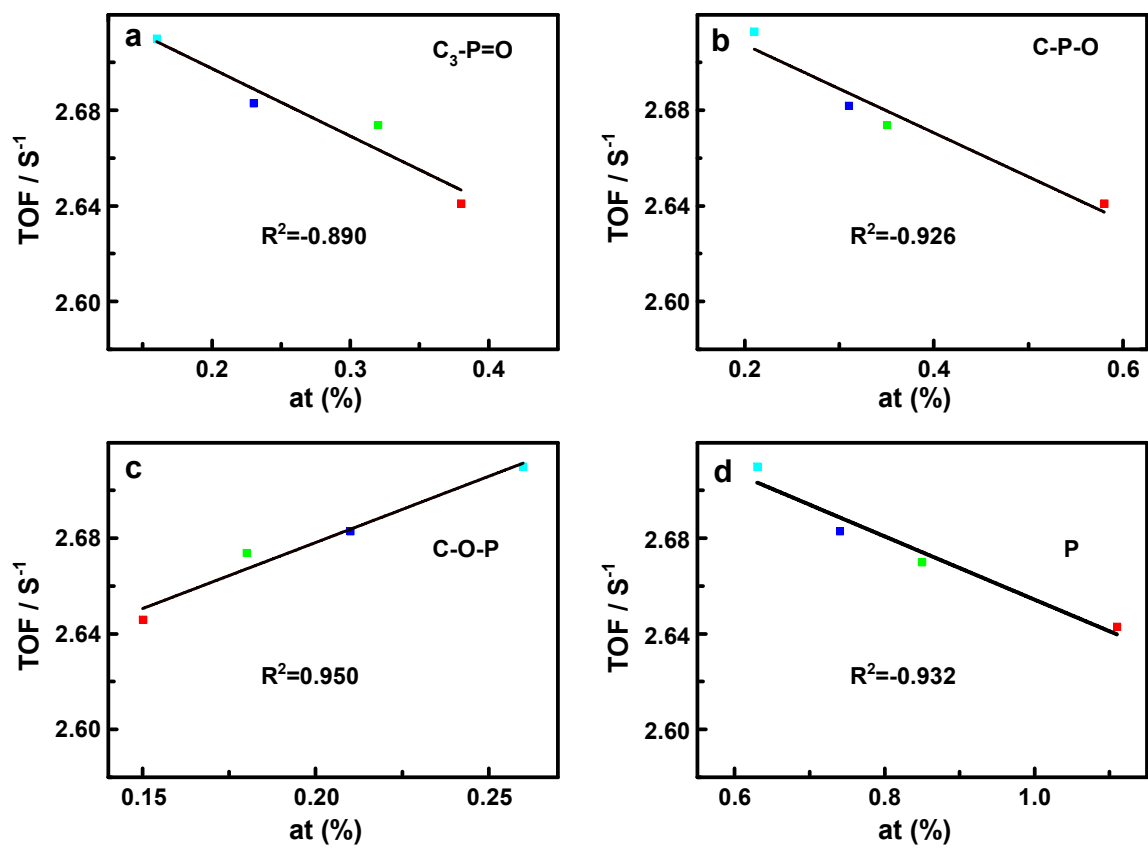

**Figure S4.** The relevancy between the TOF of Pt@PDG1 (■), Pt@PDG2 (■), Pt@PDG3 (■) and Pt@PDG4 (■) at -0.335 V and the P species contents in them under alkaline media.

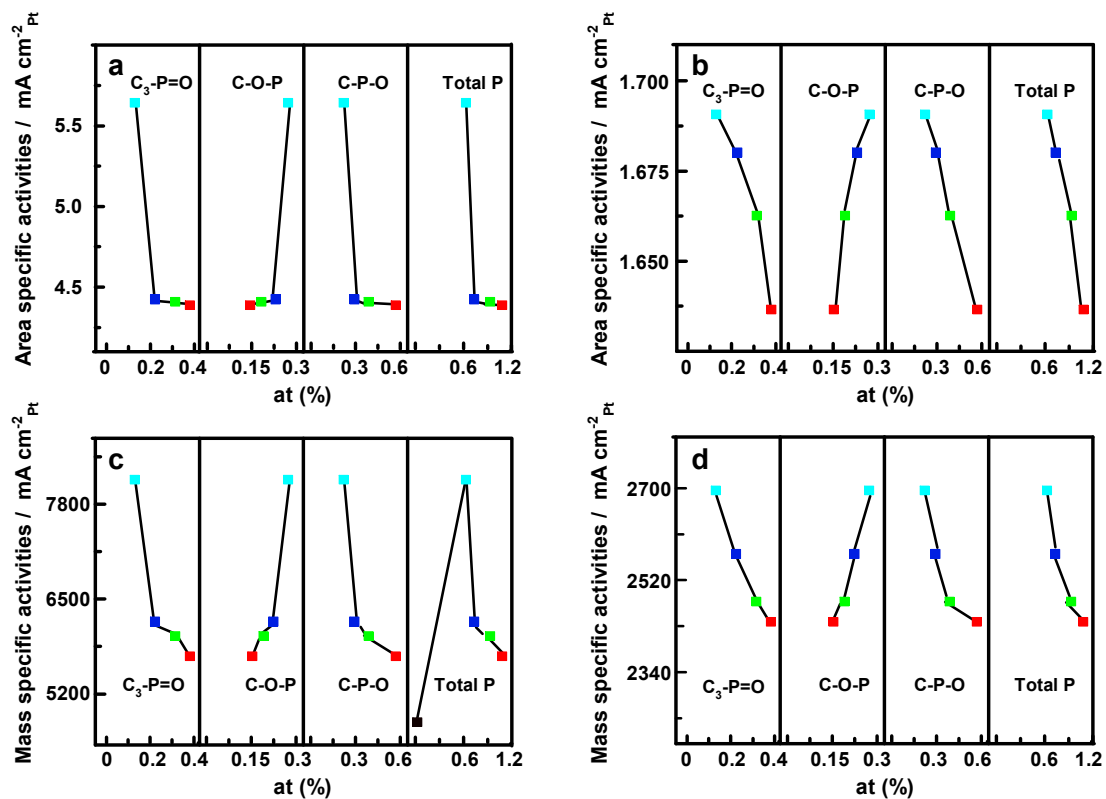

**Figure S5.** Dependences of area and mass specific activities of Pt@PDG1 (■), Pt@PDG2 (■), Pt@PDG3 (■) and Pt@PDG4 (■) on total P, C<sub>3</sub>-P=O, C-P-O and C-O-P contents under acid media (a and c) and alkaline media (b and d).

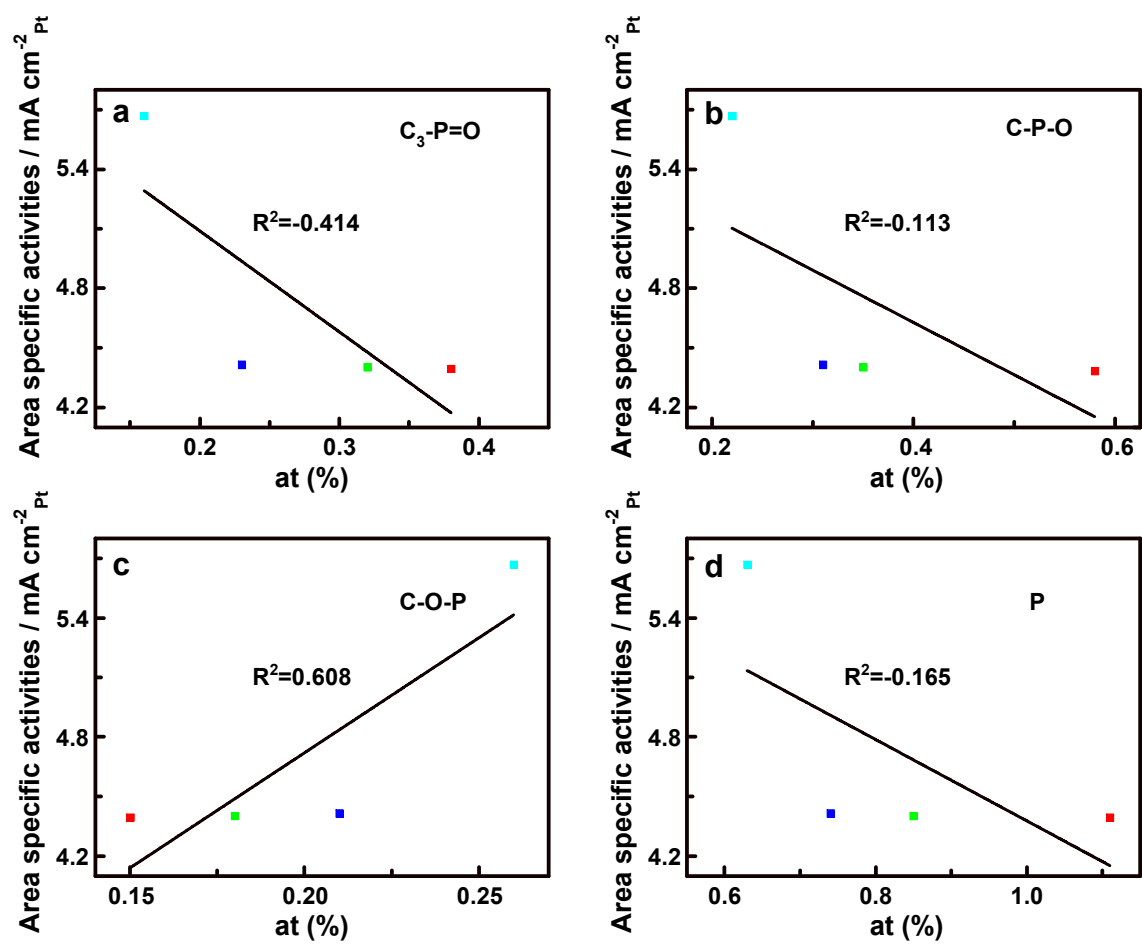

**Figure S6.** The relevancy between the area specific activities of Pt@PDG1 (■), Pt@PDG2 (■), Pt@PDG3 (■) and Pt@PDG4 (■) at -0.2 V and the P species contents in them in acid medium.

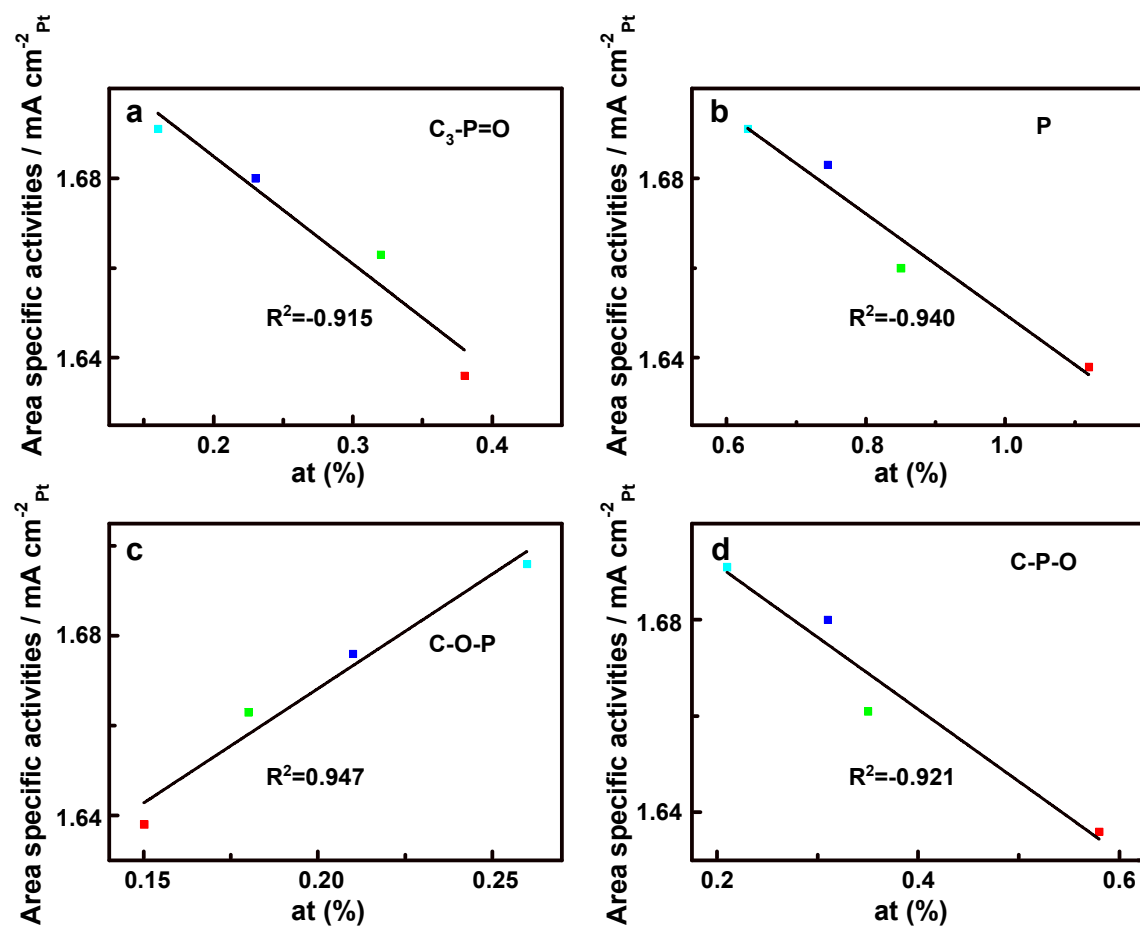

**Figure S7.** The relevancy between the area specific activities of Pt@PDG1 (■), Pt@PDG2 (■), Pt@PDG3 (■) and Pt@PDG4 (■) at -0.215 V and the P species contents in them in alkaline medium.

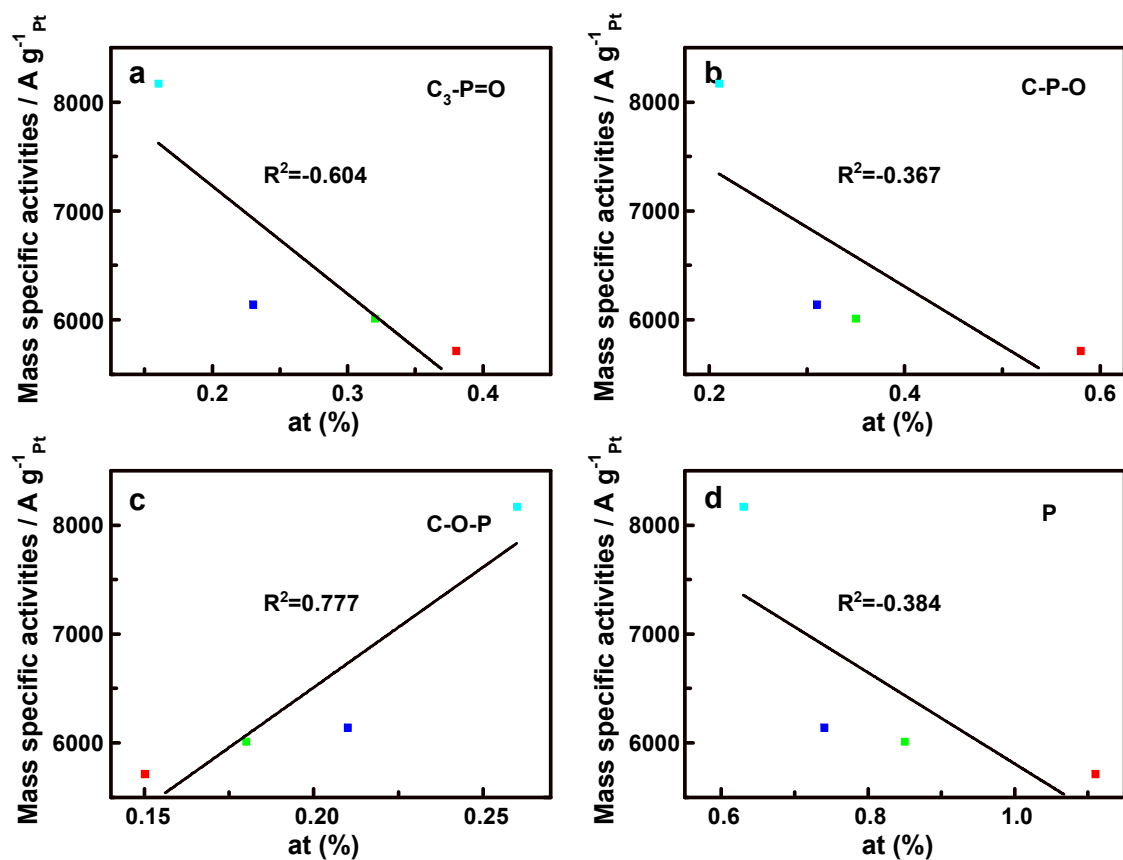

**Figure S8.** The relevancy between the mass specific activities of Pt@PDG1 (■), Pt@PDG2 (■), Pt@PDG3 (■) and Pt@PDG4 (■) at -0.2 V and the P species contents in them in acid medium.

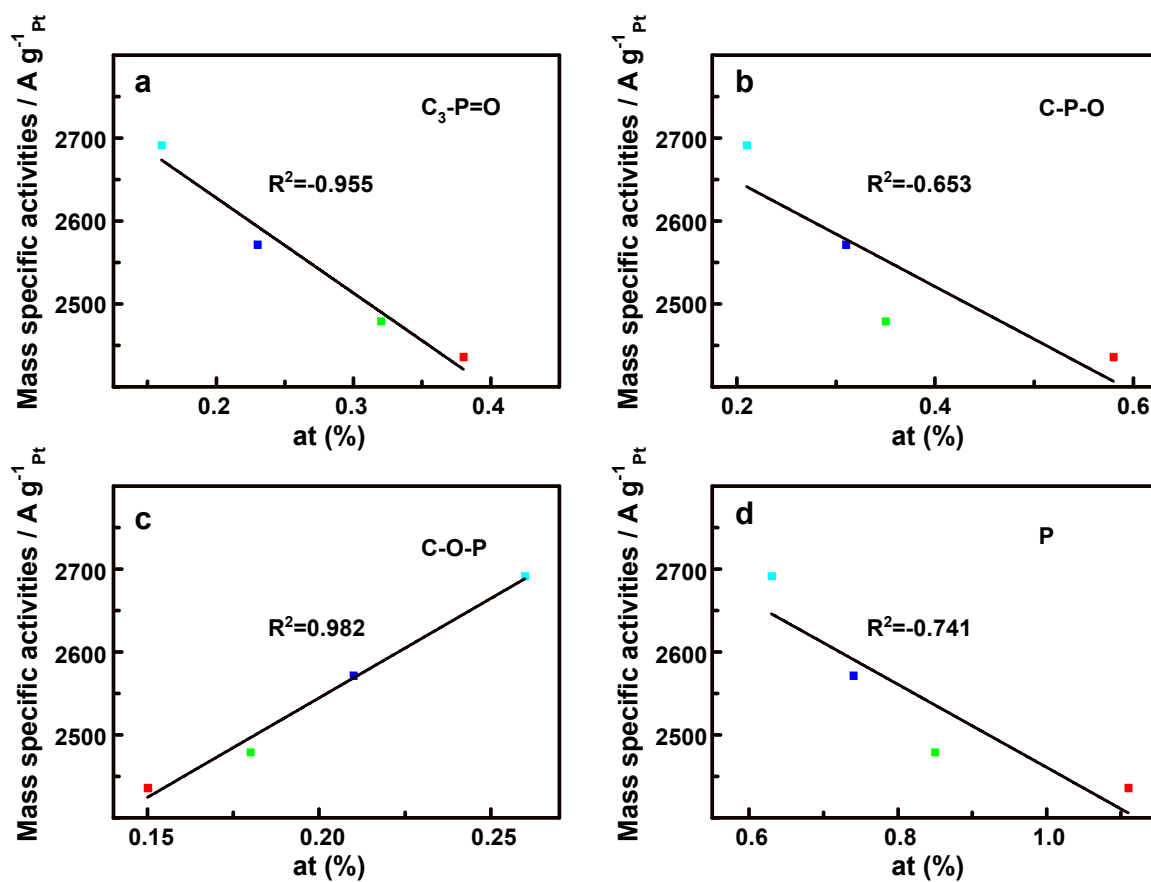

**Figure S9.** The relevancy between the mass specific activities of Pt@PDG1 (■), Pt@PDG2 (■), Pt@PDG3 (■) and Pt@PDG4 (■) at -0.215 V and the P species contents in them in alkaline medium.

**Table S1.** The ECSAs of Pt@PDG1, Pt@PDG2, Pt@PDG3, Pt@PDG4 and Pt@PDG5 and 20% Pt/C together with area and mass specific activities at -0.2 and -0.215 V in acidic and basic media.

|          | ECSA(m <sup>2</sup> g <sup>-1</sup> ) |          | Area specific activities<br>(mA cm <sup>-2</sup> <sub>Pt</sub> ) |          | Mass specific activities<br>(A g <sup>-1</sup> <sub>Pt</sub> ) |          |
|----------|---------------------------------------|----------|------------------------------------------------------------------|----------|----------------------------------------------------------------|----------|
|          | acidic                                | alkaline | acidic                                                           | alkaline | acidic                                                         | alkaline |
| Pt@PDG1  | 130.050                               | 148.917  | 4.395                                                            | 1.636    | 5715.92                                                        | 2436.28  |
| Pt@PDG2  | 136.547                               | 149.061  | 4.403                                                            | 1.663    | 6012.16                                                        | 2478.88  |
| Pt@PDG3  | 139.093                               | 153.068  | 4.415                                                            | 1.680    | 6140.96                                                        | 2571.54  |
| Pt@PDG4  | 144.155                               | 159.169  | 5.668                                                            | 1.691    | 8170.71                                                        | 2691.55  |
| Pt@PDG5  | 112.576                               | 137.759  | 4.248                                                            | 1.630    | 4782.23                                                        | 2245.47  |
| 20 %Pt/C | 247.797                               | 270.833  | 1.262                                                            | 0.375    | 3126.62                                                        | 1015.62  |

## Reference

[1] H.J. Huang, Y. Fan, X. Wang, *Electrochim. Acta.*, **2012**, 80, 118-125.
